# Supplementary material
Source: MDPI journal article supplement (https://www.mdpi.com/2304-6740/4/4/39)
Supplement: s1 [file s1]

# **Supplementary Materials: Reduction of Bromo- and Iodo-2,6-bis(diphenylphosphanylmethyl)benzene with Magnesium and Calcium**

Alexander Koch, Sven Krieck, Helmar Görls and Matthias Westerhausen

## **Content**

Table S1. Crystal data and refinement details for the X-ray structure determinations of the compounds **1a**, **2**, **3a**, **3b**, and **4**.

Cartesian coordinates of calculated structures.

**Table S1.** Crystal data and refinement details for the X-ray structure determinations of the compounds **1a**, **2**, **3a**, **3b**, and **4**.

| Compound                                                                    | 1a                                               | 2                                                | 3a                                                                                             | 3b                                                                                            | 4                                                                |
|-----------------------------------------------------------------------------|--------------------------------------------------|--------------------------------------------------|------------------------------------------------------------------------------------------------|-----------------------------------------------------------------------------------------------|------------------------------------------------------------------|
| formula                                                                     | C <sub>32</sub> H <sub>27</sub> BrP <sub>2</sub> | C <sub>64</sub> H <sub>54</sub> MgP <sub>4</sub> | C <sub>48</sub> H <sub>68</sub> Br <sub>2</sub> Ca <sub>2</sub> O <sub>10</sub> P <sub>2</sub> | C <sub>56</sub> H <sub>88</sub> Ca <sub>2</sub> I <sub>2</sub> O <sub>12</sub> P <sub>2</sub> | C <sub>12</sub> H <sub>28</sub> Br <sub>2</sub> CaO <sub>5</sub> |
| fw (g·mol <sup>−1</sup> )                                                   | 553.39                                           | 971.26                                           | 1106.94                                                                                        | 1349.16                                                                                       | 452.24                                                           |
| T/°C                                                                        | −140(2)                                          | −140(2)                                          | −140(2)                                                                                        | −140(2)                                                                                       | −140(2)                                                          |
| crystal system                                                              | triclinic                                        | monoclinic                                       | monoclinic                                                                                     | monoclinic                                                                                    | orthorhombic                                                     |
| space group                                                                 | <i>P</i> $\bar{1}$                               | <i>P</i> 2 <sub>1</sub> /c                       | <i>P</i> 2 <sub>1</sub> /n                                                                     | <i>P</i> 2 <sub>1</sub> /n                                                                    | <i>P</i> bcn                                                     |
| <i>a</i> /Å                                                                 | 9.3025(3)                                        | 12.4695(2)                                       | 11.3347(4)                                                                                     | 12.3778(3)                                                                                    | 11.4609(3)                                                       |
| <i>b</i> /Å                                                                 | 10.1879(4)                                       | 20.0948(3)                                       | 19.4430(8)                                                                                     | 17.8753(4)                                                                                    | 11.5457(3)                                                       |
| <i>c</i> /Å                                                                 | 15.2499(6)                                       | 20.8722(3)                                       | 12.3105(4)                                                                                     | 14.3016(3)                                                                                    | 14.2003(3)                                                       |
| $\alpha$ /°                                                                 | 104.318(2)                                       | 90                                               | 90                                                                                             | 90                                                                                            | 90                                                               |
| $\beta$ /°                                                                  | 106.891(2)                                       | 90.828(1)                                        | 101.618(2)                                                                                     | 103.851(1)                                                                                    | 90                                                               |
| $\gamma$ /°                                                                 | 95.661(2)                                        | 90                                               | 90                                                                                             | 90                                                                                            | 90                                                               |
| <i>V</i> /Å <sup>3</sup>                                                    | 1317.12(8)                                       | 5229.44(14)                                      | 2657.41(17)                                                                                    | 3072.31(12)                                                                                   | 1879.04(8)                                                       |
| <i>Z</i>                                                                    | 2                                                | 4                                                | 2                                                                                              | 2                                                                                             | 4                                                                |
| $\rho$ (g·cm <sup>−3</sup> )                                                | 1.395                                            | 1.234                                            | 1.383                                                                                          | 1.458                                                                                         | 1.599                                                            |
| $\mu$ (cm <sup>−1</sup> )                                                   | 17.01                                            | 1.97                                             | 18.3                                                                                           | 12.99                                                                                         | 46                                                               |
| measured data                                                               | 14,817                                           | 34,467                                           | 15,087                                                                                         | 17,438                                                                                        | 8358                                                             |
| data with $I > 2\sigma(I)$                                                  | 5142                                             | 10,279                                           | 4113                                                                                           | 6320                                                                                          | 1974                                                             |
| unique data ( <i>R</i> <sub>int</sub> )                                     | 5981/0.0318                                      | 11,953/0.0528                                    | 5811/0.0421                                                                                    | 6997/0.0214                                                                                   | 2138/0.0234                                                      |
| w <i>R</i> <sub>2</sub> (all data, on <i>F</i> <sup>2</sup> ) <sup>a)</sup> | 0.0863                                           | 0.1342                                           | 0.3082                                                                                         | 0.1914                                                                                        | 0.0452                                                           |
| <i>R</i> <sub>1</sub> ( $I > 2\sigma(I)$ ) <sup>a)</sup>                    | 0.0380                                           | 0.0576                                           | 0.1127                                                                                         | 0.0701                                                                                        | 0.0185                                                           |
| <i>s</i> <sup>b)</sup>                                                      | 1.064                                            | 1.128                                            | 1.091                                                                                          | 1.062                                                                                         | 1.099                                                            |
| Res. dens./e·Å <sup>−3</sup>                                                | 0.408/−0.411                                     | 0.691/−0.363                                     | 1.342/−0.648                                                                                   | 2.123/−1.078                                                                                  | 0.319/−0.281                                                     |
| absorpt method                                                              | multi-scan                                       | multi-scan                                       | multi-scan                                                                                     | multi-scan                                                                                    | multi-scan                                                       |
| absorpt corr <i>T</i> <sub>min</sub> / <sub>max</sub>                       | 0.6317/0.7456                                    | 0.6382/0.7456                                    | 0.5212/0.7456                                                                                  | 0.6755/0.7456                                                                                 | 0.5713/0.7456                                                    |
| CCDC No.                                                                    | 1509090                                          | 1509091                                          | motif                                                                                          | 1509092                                                                                       | 1509093                                                          |

<sup>a)</sup> Definition of the *R* indices:  $R_1 = (\sum ||F_o| - |F_c||) / \sum |F_o|$ ;  $wR_2 = \{\sum [w(F_o^2 - F_c^2)^2] / \sum [w(F_o^2)^2]\}^{1/2}$  with  $w^{-1} = \sigma^2(F_o^2) + (aP)^2 + bP$ ;  $P = [2F_c^2 + \text{Max}(F_o^2)]/3$ ;

<sup>b)</sup>  $s = \{\sum [w(F_o^2 - F_c^2)^2] / (N_o - N_p)\}^{1/2}$ .

**Cartesian coordinates of calculated molecules****[ (thf) Mg] <sup>2+</sup>**

|    |           |           |           |
|----|-----------|-----------|-----------|
| Mg | 0.597752  | -0.852137 | -0.142065 |
| O  | -1.371456 | -0.887275 | 0.009491  |
| C  | -2.224413 | -2.096137 | -0.170780 |
| C  | -2.228261 | 0.308621  | 0.223439  |
| C  | -3.625922 | -1.626835 | 0.189477  |
| H  | -2.137542 | -2.395780 | -1.215744 |
| H  | -1.830202 | -2.872443 | 0.482646  |
| C  | -3.612031 | -0.143075 | -0.207502 |
| H  | -2.178467 | 0.554874  | 1.284795  |
| H  | -1.811432 | 1.118717  | -0.373103 |
| H  | -3.804991 | -1.737025 | 1.261147  |
| H  | -4.384252 | -2.197729 | -0.346310 |
| H  | -4.391076 | 0.433386  | 0.291452  |
| H  | -3.734569 | -0.028497 | -1.286964 |

**[ (thf) <sub>2</sub> Mg] <sup>2+</sup>**

|    |           |           |           |
|----|-----------|-----------|-----------|
| Mg | 0.534284  | -0.518781 | 0.485893  |
| O  | -1.426737 | -0.714141 | 0.197173  |
| C  | -2.149938 | -2.006747 | 0.093818  |
| C  | -2.381471 | 0.412049  | 0.046067  |
| C  | -3.524381 | -1.631517 | -0.435163 |
| H  | -1.576880 | -2.652478 | -0.569044 |
| H  | -2.192260 | -2.433948 | 1.096294  |
| C  | -3.752681 | -0.234245 | 0.160413  |
| H  | -2.160338 | 1.134387  | 0.830424  |
| H  | -2.208883 | 0.853361  | -0.936349 |
| H  | -4.280531 | -2.351137 | -0.121450 |
| H  | -3.518421 | -1.589877 | -1.526589 |
| H  | -4.058034 | -0.304621 | 1.206849  |
| H  | -4.507004 | 0.336573  | -0.381124 |
| O  | 2.490445  | -0.723179 | 0.184285  |
| C  | 3.521454  | -0.588835 | 1.245953  |
| C  | 3.130602  | -1.124876 | -1.092919 |
| C  | 4.777766  | -1.190431 | 0.635610  |
| H  | 3.627569  | 0.475870  | 1.456402  |
| H  | 3.157187  | -1.114587 | 2.127252  |
| C  | 4.613443  | -0.889982 | -0.862058 |
| H  | 2.899438  | -2.178006 | -1.257222 |
| H  | 2.695357  | -0.513554 | -1.881520 |
| H  | 4.812719  | -2.267998 | 0.811173  |
| H  | 5.677525  | -0.743748 | 1.058644  |
| H  | 5.220375  | -1.541482 | -1.490846 |
| H  | 4.877886  | 0.146885  | -1.081562 |

**[ (thf) <sub>3</sub> Mg] <sup>2+</sup>**

|    |           |           |           |
|----|-----------|-----------|-----------|
| Mg | 0.539190  | -1.087197 | 0.172964  |
| O  | -1.403290 | -1.401962 | -0.226884 |
| C  | -2.014955 | -2.741177 | -0.394345 |
| C  | -2.438328 | -0.355231 | -0.379782 |
| C  | -3.394104 | -2.463851 | -0.971772 |
| H  | -1.361796 | -3.321137 | -1.044704 |
| H  | -2.065664 | -3.201520 | 0.593386  |

|   |           |           |           |
|---|-----------|-----------|-----------|
| C | -3.758005 | -1.109575 | -0.345678 |
| H | -2.312546 | 0.358582  | 0.433198  |
| H | -2.266342 | 0.135228  | -1.339125 |
| H | -4.100732 | -3.252258 | -0.712594 |
| H | -3.347612 | -2.386448 | -2.060417 |
| H | -4.099935 | -1.239600 | 0.683770  |
| H | -4.532723 | -0.580915 | -0.901292 |
| O | 1.927201  | -1.978904 | -0.986477 |
| C | 3.291501  | -2.356314 | -0.551410 |
| C | 1.783935  | -2.199430 | -2.443888 |
| C | 3.915234  | -3.026903 | -1.768209 |
| H | 3.809492  | -1.438336 | -0.271762 |
| H | 3.192163  | -3.010208 | 0.313941  |
| C | 3.211225  | -2.335080 | -2.945444 |
| H | 1.208099  | -3.116104 | -2.581892 |
| H | 1.237740  | -1.351097 | -2.852450 |
| H | 3.699820  | -4.097798 | -1.768739 |
| H | 4.996969  | -2.894408 | -1.785239 |
| H | 3.257766  | -2.917188 | -3.865934 |
| H | 3.647251  | -1.351424 | -3.135452 |
| O | 1.025025  | 0.396292  | 1.437684  |
| C | 0.355922  | 0.686327  | 2.727241  |
| C | 2.143484  | 1.345173  | 1.229451  |
| C | 1.311879  | 1.619645  | 3.452798  |
| H | -0.597649 | 1.164747  | 2.498736  |
| H | 0.187339  | -0.264385 | 3.231205  |
| C | 1.954856  | 2.407041  | 2.301979  |
| H | 3.072215  | 0.787609  | 1.356917  |
| H | 2.070097  | 1.722818  | 0.210646  |
| H | 2.066169  | 1.048880  | 3.999455  |
| H | 0.784324  | 2.259365  | 4.160425  |
| H | 2.904540  | 2.864018  | 2.580357  |
| H | 1.283423  | 3.193642  | 1.949996  |

[(thf)<sub>4</sub>Mg]<sup>2+</sup>

|    |           |           |           |
|----|-----------|-----------|-----------|
| Mg | -0.115398 | -0.712195 | 0.105198  |
| O  | -2.126624 | -0.536974 | 0.353717  |
| C  | -2.794989 | 0.607205  | 1.002194  |
| C  | -3.144379 | -1.459732 | -0.197302 |
| C  | -4.209153 | 0.587906  | 0.446544  |
| H  | -2.773173 | 0.439131  | 2.080787  |
| H  | -2.226279 | 1.504565  | 0.758793  |
| C  | -4.482212 | -0.914757 | 0.287098  |
| H  | -3.050229 | -1.434039 | -1.284489 |
| H  | -2.917716 | -2.460431 | 0.168960  |
| H  | -4.249093 | 1.095519  | -0.520414 |
| H  | -4.912794 | 1.076215  | 1.121032  |
| H  | -5.280546 | -1.127877 | -0.423892 |
| H  | -4.750984 | -1.358379 | 1.248249  |
| O  | 0.577608  | 0.131831  | 1.821949  |
| C  | 1.284613  | 1.426416  | 1.927630  |
| C  | 0.353504  | -0.419955 | 3.171371  |
| C  | 1.602877  | 1.589566  | 3.409604  |
| H  | 2.168306  | 1.377130  | 1.292936  |

|   |           |           |           |
|---|-----------|-----------|-----------|
| H | 0.603515  | 2.194806  | 1.558649  |
| C | 0.497345  | 0.775460  | 4.097020  |
| H | -0.634056 | -0.880642 | 3.180127  |
| H | 1.118152  | -1.177463 | 3.354219  |
| H | 1.602651  | 2.639218  | 3.703620  |
| H | 2.584460  | 1.169033  | 3.639557  |
| H | -0.436598 | 1.341355  | 4.138926  |
| H | 0.763329  | 0.471822  | 5.109742  |
| O | 0.333472  | 0.535002  | -1.440135 |
| C | 1.696601  | 0.946852  | -1.835238 |
| C | -0.645871 | 1.057856  | -2.414893 |
| C | 1.554986  | 1.435776  | -3.267938 |
| H | 2.007852  | 1.745067  | -1.159210 |
| H | 2.351472  | 0.083948  | -1.718890 |
| C | 0.140761  | 2.033377  | -3.279238 |
| H | -1.022580 | 0.209502  | -2.989403 |
| H | -1.459462 | 1.515489  | -1.853993 |
| H | 1.629505  | 0.601336  | -3.968984 |
| H | 2.325414  | 2.164953  | -3.519300 |
| H | -0.280195 | 2.107025  | -4.282028 |
| H | 0.140712  | 3.030154  | -2.831843 |
| O | 0.657839  | -2.519699 | -0.411597 |
| C | 0.454968  | -3.124903 | -1.742393 |
| C | 1.445943  | -3.433395 | 0.441365  |
| C | 1.459194  | -4.265321 | -1.802604 |
| H | -0.575798 | -3.481008 | -1.792036 |
| H | 0.617057  | -2.344214 | -2.484624 |
| C | 1.519338  | -4.736885 | -0.342133 |
| H | 2.427004  | -2.977284 | 0.583980  |
| H | 0.934488  | -3.523408 | 1.398216  |
| H | 2.435137  | -3.901038 | -2.131778 |
| H | 1.135148  | -5.049418 | -2.487111 |
| H | 2.430737  | -5.289193 | -0.112363 |
| H | 0.663274  | -5.374253 | -0.108243 |

$[(\text{thf})_5\text{Mg}]^{2+}$

|    |           |           |           |
|----|-----------|-----------|-----------|
| Mg | -2.067288 | 0.545615  | -0.274471 |
| O  | -2.894577 | 2.372993  | -0.879883 |
| C  | -4.125243 | 3.002151  | -0.416590 |
| C  | -2.126343 | 3.442298  | -1.506094 |
| C  | -4.513044 | 3.957238  | -1.544967 |
| H  | -4.844770 | 2.212360  | -0.220583 |
| H  | -3.909543 | 3.538873  | 0.512461  |
| C  | -3.163256 | 4.316942  | -2.223967 |
| H  | -1.609552 | 3.996294  | -0.717101 |
| H  | -1.390960 | 2.977180  | -2.159521 |
| H  | -5.030189 | 4.834142  | -1.155183 |
| H  | -5.179598 | 3.461721  | -2.251889 |
| H  | -2.914882 | 5.372455  | -2.112073 |
| H  | -3.195089 | 4.093691  | -3.290478 |
| O  | -1.222161 | 0.240667  | -2.160156 |
| C  | 0.193673  | -0.090512 | -2.383037 |
| C  | -1.920052 | 0.323781  | -3.455524 |
| C  | 0.429713  | 0.179686  | -3.860815 |

|                                       |           |           |           |
|---------------------------------------|-----------|-----------|-----------|
| H                                     | 0.791624  | 0.533113  | -1.720044 |
| H                                     | 0.339420  | -1.141811 | -2.126881 |
| C                                     | -0.922270 | -0.193706 | -4.483989 |
| H                                     | -2.829723 | -0.271519 | -3.384917 |
| H                                     | -2.182165 | 1.369155  | -3.625720 |
| H                                     | 1.258195  | -0.411041 | -4.252082 |
| H                                     | 0.652348  | 1.237129  | -4.024586 |
| H                                     | -1.008076 | -1.277492 | -4.592946 |
| H                                     | -1.081791 | 0.262706  | -5.461052 |
| O                                     | -4.002249 | -0.209309 | 0.030170  |
| C                                     | -4.529057 | -0.534067 | 1.363725  |
| C                                     | -4.954341 | -0.651026 | -1.001597 |
| C                                     | -5.989076 | -0.901227 | 1.135802  |
| H                                     | -3.948177 | -1.370385 | 1.759225  |
| H                                     | -4.386964 | 0.341211  | 1.997450  |
| C                                     | -5.963033 | -1.523877 | -0.267208 |
| H                                     | -5.416178 | 0.238530  | -1.435163 |
| H                                     | -4.392544 | -1.180734 | -1.771442 |
| H                                     | -6.616366 | -0.006608 | 1.148664  |
| H                                     | -6.355382 | -1.587994 | 1.899021  |
| H                                     | -6.936715 | -1.510391 | -0.757352 |
| H                                     | -5.615956 | -2.559014 | -0.222935 |
| O                                     | -1.307424 | -1.276175 | 0.396318  |
| C                                     | -0.272453 | -1.549797 | 1.403135  |
| C                                     | -1.723563 | -2.533799 | -0.237243 |
| C                                     | -0.285393 | -3.061415 | 1.587599  |
| H                                     | 0.682265  | -1.199598 | 1.005719  |
| H                                     | -0.520100 | -0.990920 | 2.303558  |
| C                                     | -0.688804 | -3.564206 | 0.194987  |
| H                                     | -2.721617 | -2.781061 | 0.130224  |
| H                                     | -1.762649 | -2.366485 | -1.313921 |
| H                                     | -1.029511 | -3.352658 | 2.333098  |
| H                                     | 0.686685  | -3.435020 | 1.910569  |
| H                                     | -1.104333 | -4.572057 | 0.207509  |
| H                                     | 0.170727  | -3.556279 | -0.479943 |
| O                                     | -0.920629 | 1.536880  | 1.172604  |
| C                                     | -1.514274 | 1.964099  | 2.447808  |
| C                                     | 0.449099  | 2.057481  | 1.065180  |
| C                                     | -0.527396 | 2.962207  | 3.040836  |
| H                                     | -2.494030 | 2.393240  | 2.235817  |
| H                                     | -1.630114 | 1.076403  | 3.073790  |
| C                                     | 0.817603  | 2.480264  | 2.479379  |
| H                                     | 1.075945  | 1.262550  | 0.661870  |
| H                                     | 0.438876  | 2.903346  | 0.374155  |
| H                                     | -0.560142 | 2.960512  | 4.130436  |
| H                                     | -0.748949 | 3.973620  | 2.691889  |
| H                                     | 1.189493  | 1.625220  | 3.049109  |
| H                                     | 1.582726  | 3.256864  | 2.482999  |
| [(thf) <sub>6</sub> Mg] <sup>2+</sup> |           |           |           |
| Mg                                    | -0.358043 | 0.564146  | 0.000120  |
| O                                     | -0.356680 | 0.026297  | -2.098831 |
| C                                     | -0.194400 | -1.328711 | -2.642399 |
| C                                     | -0.511143 | 0.973996  | -3.211970 |

|   |           |           |           |
|---|-----------|-----------|-----------|
| C | -0.009870 | -1.154993 | -4.145010 |
| H | 0.655210  | -1.796669 | -2.150664 |
| H | -1.096708 | -1.898313 | -2.410142 |
| C | -0.813237 | 0.118639  | -4.433444 |
| H | -1.305523 | 1.670601  | -2.955047 |
| H | 0.427633  | 1.520602  | -3.324612 |
| H | -0.369984 | -2.024031 | -4.696272 |
| H | 1.044956  | -1.006912 | -4.389848 |
| H | -1.882007 | -0.102499 | -4.492717 |
| H | -0.513250 | 0.614445  | -5.357022 |
| O | -0.071640 | -1.514428 | 0.509535  |
| C | -1.151838 | -2.484794 | 0.737768  |
| C | 1.223076  | -2.185643 | 0.687628  |
| C | -0.478379 | -3.849837 | 0.746886  |
| H | -1.614457 | -2.253860 | 1.699618  |
| H | -1.886661 | -2.365595 | -0.054512 |
| C | 0.904270  | -3.530496 | 1.326843  |
| H | 1.682992  | -2.305548 | -0.295851 |
| H | 1.857353  | -1.547250 | 1.298281  |
| H | -0.388692 | -4.238862 | -0.270517 |
| H | -1.037611 | -4.571498 | 1.342903  |
| H | 1.656585  | -4.280663 | 1.082269  |
| H | 0.853377  | -3.437422 | 2.414691  |
| O | -2.505998 | 0.297827  | 0.050792  |
| C | -3.357639 | 0.506858  | 1.229975  |
| C | -3.345746 | -0.132153 | -1.076185 |
| C | -4.782328 | 0.553677  | 0.697972  |
| H | -3.209516 | -0.336373 | 1.908300  |
| H | -3.039293 | 1.424552  | 1.718685  |
| C | -4.718857 | -0.421723 | -0.483104 |
| H | -3.383129 | 0.682570  | -1.802173 |
| H | -2.879708 | -0.998137 | -1.541468 |
| H | -5.032036 | 1.561049  | 0.354694  |
| H | -5.506626 | 0.260284  | 1.458310  |
| H | -5.512611 | -0.264284 | -1.213793 |
| H | -4.777663 | -1.454429 | -0.130471 |
| O | -0.644352 | 2.642255  | -0.510529 |
| C | 0.435605  | 3.612811  | -0.738808 |
| C | -1.939269 | 3.313136  | -0.688744 |
| C | -0.237908 | 4.977806  | -0.745504 |
| H | 1.171272  | 3.492570  | 0.052505  |
| H | 0.897144  | 3.383072  | -1.701470 |
| C | -1.620672 | 4.659220  | -1.325566 |
| H | -2.572638 | 2.675584  | -1.301258 |
| H | -2.400219 | 3.430935  | 0.294459  |
| H | 0.321047  | 5.700430  | -1.340617 |
| H | -0.327233 | 5.365216  | 0.272547  |
| H | -1.570011 | 4.568093  | -2.413580 |
| H | -2.373040 | 5.408841  | -1.079493 |
| O | 1.789758  | 0.830110  | -0.050794 |
| C | 2.629479  | 1.260543  | 1.076073  |
| C | 2.641374  | 0.621277  | -1.230071 |
| C | 4.002449  | 1.550539  | 0.482863  |
| H | 2.163117  | 2.126396  | 1.541249  |

|   |           |           |           |
|---|-----------|-----------|-----------|
| H | 2.667226  | 0.445868  | 1.802084  |
| C | 4.066153  | 0.575148  | −0.698194 |
| H | 2.323397  | −0.296664 | −1.718533 |
| H | 2.492770  | 1.464326  | −1.908500 |
| H | 4.796305  | 1.393351  | 1.213500  |
| H | 4.060977  | 2.583258  | 0.130228  |
| H | 4.316338  | −0.432116 | −0.354931 |
| H | 4.790225  | 0.868800  | −1.458643 |
| O | −0.359618 | 1.101485  | 2.099064  |
| C | −0.522043 | 2.456504  | 2.642680  |
| C | −0.205879 | 0.153650  | 3.212158  |
| C | −0.706825 | 2.282690  | 4.145249  |
| H | 0.380283  | 3.026122  | 2.410527  |
| H | −1.371638 | 2.924477  | 2.150911  |
| C | 0.096081  | 1.008791  | 4.433809  |
| H | −1.144915 | −0.392592 | 3.324459  |
| H | 0.588292  | −0.543248 | 2.955381  |
| H | −1.761753 | 2.134820  | 4.389792  |
| H | −0.346701 | 3.151608  | 4.696662  |
| H | −0.204446 | 0.513003  | 5.357226  |
| H | 1.164893  | 1.229519  | 4.493586  |

[ (PMe<sub>3</sub>)Mg]<sup>2+</sup>

|    |           |           |           |
|----|-----------|-----------|-----------|
| Mg | 3.551874  | 0.345375  | 0.082439  |
| P  | 0.998650  | 0.246089  | −0.012338 |
| C  | 0.276485  | 1.150940  | −1.434796 |
| H  | −0.810696 | 1.185470  | −1.336780 |
| H  | 0.666125  | 2.169735  | −1.464641 |
| H  | 0.535845  | 0.644472  | −2.365156 |
| C  | 0.290805  | 1.041786  | 1.483316  |
| H  | −0.799904 | 1.022735  | 1.438940  |
| H  | 0.623139  | 0.510402  | 2.376674  |
| H  | 0.628241  | 2.077848  | 1.541626  |
| C  | 0.277138  | −1.436947 | −0.069387 |
| H  | 0.603100  | −1.950597 | −0.974500 |
| H  | 0.603833  | −2.008119 | 0.800257  |
| H  | −0.813115 | −1.373691 | −0.065654 |

[ (PMe<sub>3</sub>)<sub>2</sub>Mg]<sup>2+</sup>

|    |           |           |           |
|----|-----------|-----------|-----------|
| Mg | 3.194039  | 0.717791  | 0.394266  |
| P  | 0.639947  | 0.396840  | 0.035556  |
| C  | −0.101735 | 1.648476  | −1.084919 |
| H  | −1.172072 | 1.463282  | −1.196815 |
| H  | 0.046410  | 2.648243  | −0.674125 |
| H  | 0.372481  | 1.593982  | −2.065707 |
| C  | −0.361108 | 0.493492  | 1.570895  |
| H  | −1.417711 | 0.347198  | 1.337917  |
| H  | −0.040612 | −0.277833 | 2.272823  |
| H  | −0.230421 | 1.471659  | 2.035752  |
| C  | 0.190153  | −1.218015 | −0.713192 |
| H  | 0.672611  | −1.323174 | −1.686255 |
| H  | 0.516758  | −2.033037 | −0.065529 |
| H  | −0.892558 | −1.279008 | −0.843670 |
| P  | 5.739897  | 0.307384  | 0.132860  |



|   |          |           |           |
|---|----------|-----------|-----------|
| C | 6.666532 | 1.766622  | -0.486112 |
| H | 7.727023 | 1.524685  | -0.582931 |
| H | 6.278480 | 2.066141  | -1.460841 |
| H | 6.553345 | 2.598427  | 0.210294  |
| C | 6.147068 | -1.046241 | -1.039220 |
| H | 7.229794 | -1.176643 | -1.097089 |
| H | 5.694395 | -1.979267 | -0.700257 |
| H | 5.763778 | -0.807738 | -2.032233 |
| C | 6.582880 | -0.157133 | 1.696456  |
| H | 6.453598 | 0.634040  | 2.436595  |
| H | 6.153470 | -1.080069 | 2.089042  |
| H | 7.649339 | -0.308070 | 1.516435  |

[ (PMe<sub>3</sub>)<sub>3</sub>Mg]<sup>2+</sup>

|    |           |           |           |
|----|-----------|-----------|-----------|
| Mg | 3.345011  | 0.562009  | 0.178255  |
| P  | 1.080694  | -0.412313 | -0.704910 |
| C  | 0.792675  | -0.182825 | -2.507298 |
| H  | -0.170361 | -0.611843 | -2.793346 |
| H  | 0.794044  | 0.881287  | -2.750009 |
| H  | 1.583701  | -0.672905 | -3.076895 |
| C  | -0.425862 | 0.296589  | 0.075234  |
| H  | -1.322000 | -0.176472 | -0.332603 |
| H  | -0.398501 | 0.136879  | 1.154209  |
| H  | -0.471854 | 1.369427  | -0.118759 |
| C  | 0.907310  | -2.225877 | -0.448779 |
| H  | 1.717791  | -2.752351 | -0.955553 |
| H  | 0.953867  | -2.456020 | 0.617028  |
| H  | -0.047339 | -2.575742 | -0.846874 |
| P  | 5.612767  | -0.303878 | -0.821169 |
| C  | 6.861911  | 1.016622  | -1.105805 |
| H  | 7.780563  | 0.590546  | -1.514602 |
| H  | 6.467292  | 1.751693  | -1.809494 |
| H  | 7.088698  | 1.521707  | -0.165414 |
| C  | 5.468277  | -1.144813 | -2.450548 |
| H  | 6.452476  | -1.466522 | -2.798517 |
| H  | 4.820240  | -2.018285 | -2.360217 |
| H  | 5.036803  | -0.461734 | -3.184090 |
| C  | 6.481210  | -1.531003 | 0.238673  |
| H  | 6.708758  | -1.088391 | 1.209456  |
| H  | 5.844838  | -2.403991 | 0.393010  |
| H  | 7.412712  | -1.849304 | -0.234323 |
| P  | 3.354313  | 2.238725  | 2.200642  |
| C  | 5.025715  | 2.599878  | 2.877236  |
| H  | 5.466347  | 1.685130  | 3.276654  |
| H  | 5.673629  | 2.986769  | 2.089007  |
| H  | 4.958314  | 3.338936  | 3.678457  |
| C  | 2.381287  | 1.717102  | 3.670300  |
| H  | 1.337628  | 1.567194  | 3.389871  |
| H  | 2.777481  | 0.779300  | 4.063271  |
| H  | 2.435169  | 2.481328  | 4.448936  |
| C  | 2.670351  | 3.891903  | 1.772448  |
| H  | 3.230909  | 4.321845  | 0.940663  |
| H  | 1.624490  | 3.793852  | 1.476116  |
| H  | 2.734721  | 4.564608  | 2.630238  |

$[(\text{PMe}_3)_4\text{Mg}]^{2+}$ 

|    |           |           |           |
|----|-----------|-----------|-----------|
| Mg | 3.195903  | 0.943726  | −0.386288 |
| P  | 1.039676  | −0.585128 | −0.488844 |
| C  | 0.394140  | −0.828330 | −2.194990 |
| H  | −0.463900 | −1.504038 | −2.186858 |
| H  | 0.086247  | 0.130889  | −2.614366 |
| H  | 1.175495  | −1.251576 | −2.828437 |
| C  | −0.422903 | 0.015000  | 0.451781  |
| H  | −1.251934 | −0.690088 | 0.360513  |
| H  | −0.163632 | 0.125705  | 1.505998  |
| H  | −0.738191 | 0.985652  | 0.065402  |
| C  | 1.291738  | −2.298177 | 0.132675  |
| H  | 2.118364  | −2.767079 | −0.403869 |
| H  | 1.536006  | −2.273240 | 1.195640  |
| H  | 0.387818  | −2.894825 | −0.009658 |
| P  | 5.371391  | −0.553097 | −0.621081 |
| C  | 6.945059  | 0.397420  | −0.725822 |
| H  | 7.798025  | −0.282141 | −0.783298 |
| H  | 6.935815  | 1.029941  | −1.614650 |
| H  | 7.056183  | 1.032134  | 0.154266  |
| C  | 5.471253  | −1.696224 | −2.060397 |
| H  | 6.394807  | −2.278012 | −2.019675 |
| H  | 4.620493  | −2.378943 | −2.056087 |
| H  | 5.453646  | −1.121150 | −2.988096 |
| C  | 5.624452  | −1.650528 | 0.835749  |
| H  | 5.688612  | −1.043172 | 1.740821  |
| H  | 4.779729  | −2.334293 | 0.932967  |
| H  | 6.542930  | −2.231970 | 0.729822  |
| P  | 3.445838  | 2.123333  | 2.002753  |
| C  | 5.130528  | 2.767163  | 2.366968  |
| H  | 5.848542  | 1.946203  | 2.336110  |
| H  | 5.415085  | 3.508221  | 1.618081  |
| H  | 5.161039  | 3.230550  | 3.355704  |
| C  | 3.079280  | 1.021467  | 3.432567  |
| H  | 2.044402  | 0.679648  | 3.376521  |
| H  | 3.735824  | 0.149897  | 3.414946  |
| H  | 3.224684  | 1.555442  | 4.374206  |
| C  | 2.347877  | 3.572631  | 2.295225  |
| H  | 2.558604  | 4.353265  | 1.563016  |
| H  | 1.303430  | 3.271973  | 2.195180  |
| H  | 2.506077  | 3.976089  | 3.297980  |
| C  | 3.249958  | 1.632616  | −4.059472 |
| H  | 3.253947  | 2.310888  | −4.915116 |
| H  | 4.151207  | 1.017399  | −4.089451 |
| H  | 2.379449  | 0.977691  | −4.125171 |
| C  | 1.736612  | 3.675433  | −2.659185 |
| H  | 1.672806  | 4.349756  | −1.803516 |
| H  | 1.816526  | 4.267788  | −3.573413 |
| H  | 0.825661  | 3.076168  | −2.701045 |
| C  | 4.629070  | 3.728388  | −2.611002 |
| H  | 4.651767  | 4.394808  | −1.747167 |
| H  | 5.562615  | 3.163811  | −2.640686 |
| H  | 4.547816  | 4.328319  | −3.520220 |

|                                       |           |           |           |
|---------------------------------------|-----------|-----------|-----------|
| P                                     | 3.199874  | 2.574159  | −2.476674 |
| [(thf)Ca] <sup>2+</sup>               |           |           |           |
| Ca                                    | 0.946702  | −0.885335 | −0.002643 |
| O                                     | −1.397800 | −0.886944 | −0.002131 |
| C                                     | −2.246960 | −2.076354 | −0.197318 |
| C                                     | −2.246947 | 0.301251  | 0.198309  |
| C                                     | −3.648576 | −1.629034 | 0.196301  |
| H                                     | −2.185455 | −2.360117 | −1.250116 |
| H                                     | −1.848318 | −2.876591 | 0.425915  |
| C                                     | −3.648220 | −0.145124 | −0.196958 |
| H                                     | −2.185945 | 0.580820  | 1.252327  |
| H                                     | −1.848235 | 1.104141  | −0.421486 |
| H                                     | −3.799020 | −1.741836 | 1.272760  |
| H                                     | −4.415355 | −2.206643 | −0.320282 |
| H                                     | −4.415415 | 0.432578  | 0.318898  |
| H                                     | −3.797318 | −0.032148 | −1.273598 |
| [(thf) <sub>2</sub> Ca] <sup>2+</sup> |           |           |           |
| Ca                                    | 0.525483  | −0.601045 | 0.648714  |
| O                                     | −1.769946 | −0.777984 | 0.218078  |
| C                                     | −2.566821 | −2.015011 | 0.222072  |
| C                                     | −2.639930 | 0.368208  | −0.093640 |
| C                                     | −3.915548 | −1.626359 | −0.370319 |
| H                                     | −2.028517 | −2.763022 | −0.360658 |
| H                                     | −2.656422 | −2.348951 | 1.257923  |
| C                                     | −4.059806 | −0.159018 | 0.059464  |
| H                                     | −2.387145 | 1.174030  | 0.595990  |
| H                                     | −2.429086 | 0.679387  | −1.119412 |
| H                                     | −4.717917 | −2.261476 | 0.005597  |
| H                                     | −3.894580 | −1.707857 | −1.459738 |
| H                                     | −4.384806 | −0.092402 | 1.100743  |
| H                                     | −4.765637 | 0.397449  | −0.557522 |
| O                                     | 2.829556  | −0.836581 | 0.234457  |
| C                                     | 3.871367  | −0.770031 | 1.277230  |
| C                                     | 3.456012  | −1.085680 | −1.069476 |
| C                                     | 5.168850  | −1.166795 | 0.580433  |
| H                                     | 3.900239  | 0.257207  | 1.646143  |
| H                                     | 3.582771  | −1.443854 | 2.084452  |
| C                                     | 4.922685  | −0.733372 | −0.871931 |
| H                                     | 3.319888  | −2.141550 | −1.316085 |
| H                                     | 2.944494  | −0.467392 | −1.807914 |
| H                                     | 5.320603  | −2.247315 | 0.636362  |
| H                                     | 6.031911  | −0.676409 | 1.031107  |
| H                                     | 5.564312  | −1.251765 | −1.584755 |
| H                                     | 5.076479  | 0.342543  | −0.986914 |
| [(thf) <sub>3</sub> Ca] <sup>2+</sup> |           |           |           |
| Ca                                    | 0.304304  | −1.299088 | 0.393399  |
| O                                     | −1.979082 | −1.597494 | −0.113290 |
| C                                     | −2.639095 | −2.909589 | −0.171242 |
| C                                     | −2.906063 | −0.561002 | −0.593028 |
| C                                     | −3.818132 | −2.712494 | −1.111606 |
| H                                     | −1.902073 | −3.635460 | −0.517637 |

|   |           |           |           |
|---|-----------|-----------|-----------|
| H | -2.964116 | -3.170806 | 0.838945  |
| C | -4.241562 | -1.269516 | -0.799567 |
| H | -2.942901 | 0.230990  | 0.154980  |
| H | -2.504333 | -0.164735 | -1.528068 |
| H | -4.610971 | -3.437451 | -0.926197 |
| H | -3.500128 | -2.807721 | -2.152953 |
| H | -4.838558 | -1.236600 | 0.114779  |
| H | -4.819347 | -0.811519 | -1.602562 |
| O | 2.054213  | -1.944007 | -1.033562 |
| C | 3.427820  | -2.230457 | -0.591886 |
| C | 1.967639  | -2.079218 | -2.494896 |
| C | 4.111601  | -2.858552 | -1.798707 |
| H | 3.893109  | -1.283745 | -0.308169 |
| H | 3.366986  | -2.885412 | 0.277616  |
| C | 3.411477  | -2.161088 | -2.973947 |
| H | 1.413699  | -2.994683 | -2.714647 |
| H | 1.422399  | -1.217867 | -2.881622 |
| H | 3.930467  | -3.935871 | -1.826541 |
| H | 5.188844  | -2.691459 | -1.784187 |
| H | 3.495580  | -2.714001 | -3.909739 |
| H | 3.822491  | -1.160223 | -3.127467 |
| O | 1.240321  | 0.409196  | 1.723541  |
| C | 0.722449  | 0.812055  | 3.039968  |
| C | 2.379189  | 1.262480  | 1.360391  |
| C | 1.739923  | 1.804433  | 3.590782  |
| H | -0.256823 | 1.270812  | 2.885476  |
| H | 0.614855  | -0.085543 | 3.649197  |
| C | 2.310580  | 2.444431  | 2.317136  |
| H | 3.293128  | 0.680059  | 1.498700  |
| H | 2.272426  | 1.533375  | 0.309936  |
| H | 2.525049  | 1.282342  | 4.143017  |
| H | 1.274280  | 2.528094  | 4.260162  |
| H | 3.290366  | 2.897121  | 2.471331  |
| H | 1.633168  | 3.211135  | 1.932827  |

[(thf)<sub>4</sub>Ca]<sup>2+</sup>

|    |           |           |           |
|----|-----------|-----------|-----------|
| Ca | -0.079539 | -0.410290 | -0.006415 |
| O  | -2.416154 | -0.449449 | 0.210164  |
| C  | -3.217874 | 0.595149  | 0.856259  |
| C  | -3.289850 | -1.541393 | -0.237081 |
| C  | -4.666375 | 0.247937  | 0.532381  |
| H  | -3.020466 | 0.556248  | 1.930351  |
| H  | -2.893578 | 1.558748  | 0.460363  |
| C  | -4.628675 | -1.284662 | 0.442631  |
| H  | -3.368479 | -1.484813 | -1.325487 |
| H  | -2.822343 | -2.483499 | 0.047248  |
| H  | -4.960759 | 0.682058  | -0.426237 |
| H  | -5.350466 | 0.613443  | 1.298563  |
| H  | -5.458767 | -1.698814 | -0.130200 |
| H  | -4.643735 | -1.729724 | 1.440720  |
| O  | 0.703148  | 0.300822  | 2.083680  |
| C  | 1.652260  | 1.393720  | 2.343585  |
| C  | 0.239753  | -0.258524 | 3.356025  |
| C  | 1.856085  | 1.410018  | 3.856916  |

|   |           |           |           |
|---|-----------|-----------|-----------|
| H | 2.565120  | 1.191300  | 1.782993  |
| H | 1.196891  | 2.317554  | 1.980465  |
| C | 0.542194  | 0.817239  | 4.387673  |
| H | -0.819828 | -0.491836 | 3.247083  |
| H | 0.799269  | -1.177522 | 3.551706  |
| H | 2.049005  | 2.417664  | 4.225286  |
| H | 2.700063  | 0.775522  | 4.137174  |
| H | -0.249291 | 1.571070  | 4.398220  |
| H | 0.638111  | 0.403119  | 5.391636  |
| O | 0.487534  | 0.780186  | -1.941142 |
| C | 1.823723  | 0.911737  | -2.539317 |
| C | -0.478547 | 1.561913  | -2.721144 |
| C | 1.612451  | 1.664483  | -3.849665 |
| H | 2.445461  | 1.475536  | -1.840353 |
| H | 2.233968  | -0.089678 | -2.670041 |
| C | 0.366432  | 2.512239  | -3.556118 |
| H | -1.048714 | 0.870544  | -3.347030 |
| H | -1.151674 | 2.058558  | -2.021607 |
| H | 1.415356  | 0.965627  | -4.665974 |
| H | 2.483741  | 2.263664  | -4.114791 |
| H | -0.154313 | 2.830773  | -4.459488 |
| H | 0.629285  | 3.401801  | -2.977857 |
| O | 0.636629  | -2.626585 | -0.383542 |
| C | 0.425195  | -3.357414 | -1.638804 |
| C | 1.476238  | -3.421588 | 0.521318  |
| C | 1.449219  | -4.484452 | -1.618797 |
| H | -0.599510 | -3.737392 | -1.638480 |
| H | 0.554279  | -2.648941 | -2.457987 |
| C | 1.560050  | -4.802587 | -0.120148 |
| H | 2.455278  | -2.940512 | 0.580514  |
| H | 1.008605  | -3.419680 | 1.506571  |
| H | 2.408882  | -4.139744 | -2.012061 |
| H | 1.122813  | -5.338745 | -2.212370 |
| H | 2.487870  | -5.312967 | 0.139416  |
| H | 0.723164  | -5.426803 | 0.202603  |

[(thf)<sub>5</sub>Ca]<sup>2+</sup>

|    |           |           |           |
|----|-----------|-----------|-----------|
| Ca | -1.900671 | 0.569111  | -0.298012 |
| O  | -2.763280 | 2.660041  | -1.081295 |
| C  | -4.138137 | 3.145490  | -0.945629 |
| C  | -1.948963 | 3.671038  | -1.757991 |
| C  | -4.232497 | 4.349481  | -1.873806 |
| H  | -4.808258 | 2.327293  | -1.207365 |
| H  | -4.298202 | 3.428299  | 0.098343  |
| C  | -2.812033 | 4.927806  | -1.803349 |
| H  | -1.024375 | 3.796924  | -1.193014 |
| H  | -1.714406 | 3.299323  | -2.758948 |
| H  | -4.997699 | 5.054700  | -1.548122 |
| H  | -4.468534 | 4.032030  | -2.892744 |
| H  | -2.681940 | 5.514469  | -0.890390 |
| H  | -2.563576 | 5.560468  | -2.655878 |
| O  | -1.304216 | -0.028603 | -2.523813 |
| C  | 0.054078  | -0.253223 | -3.024928 |
| C  | -2.266136 | -0.165914 | -3.619472 |

|                                       |           |           |           |
|---------------------------------------|-----------|-----------|-----------|
| C                                     | -0.121367 | -0.828029 | -4.425879 |
| H                                     | 0.571239  | 0.709607  | -3.043904 |
| H                                     | 0.560871  | -0.923375 | -2.330141 |
| C                                     | -1.428000 | -0.170772 | -4.892661 |
| H                                     | -2.803476 | -1.107813 | -3.481352 |
| H                                     | -2.967013 | 0.667066  | -3.556833 |
| H                                     | -0.230126 | -1.914601 | -4.383843 |
| H                                     | 0.727806  | -0.593642 | -5.068475 |
| H                                     | -1.916939 | -0.717792 | -5.699255 |
| H                                     | -1.243479 | 0.851155  | -5.233553 |
| O                                     | -4.119342 | -0.224559 | 0.125920  |
| C                                     | -4.935736 | 0.105721  | 1.295498  |
| C                                     | -4.881201 | -1.091287 | -0.781587 |
| C                                     | -6.363625 | -0.226902 | 0.885900  |
| H                                     | -4.600444 | -0.511892 | 2.133191  |
| H                                     | -4.764041 | 1.157398  | 1.528907  |
| C                                     | -6.162210 | -1.443719 | -0.029963 |
| H                                     | -5.088220 | -0.521966 | -1.690678 |
| H                                     | -4.260315 | -1.954770 | -1.025113 |
| H                                     | -6.808332 | 0.604150  | 0.332474  |
| H                                     | -6.995123 | -0.443214 | 1.747972  |
| H                                     | -6.997303 | -1.606597 | -0.711773 |
| H                                     | -6.023599 | -2.350393 | 0.563720  |
| O                                     | -0.732052 | -1.441018 | 0.312387  |
| C                                     | 0.273289  | -1.613126 | 1.364642  |
| C                                     | -1.048026 | -2.741895 | -0.280052 |
| C                                     | 0.412299  | -3.120355 | 1.558191  |
| H                                     | 1.204871  | -1.161264 | 1.014589  |
| H                                     | -0.071836 | -1.084368 | 2.252752  |
| C                                     | 0.075933  | -3.667894 | 0.164108  |
| H                                     | -2.017361 | -3.067848 | 0.107766  |
| H                                     | -1.117621 | -2.605502 | -1.359248 |
| H                                     | -0.309418 | -3.481862 | 2.295247  |
| H                                     | 1.412030  | -3.394729 | 1.896157  |
| H                                     | -0.238203 | -4.712033 | 0.178724  |
| H                                     | 0.935569  | -3.575779 | -0.504764 |
| O                                     | -0.994840 | 1.618783  | 1.626436  |
| C                                     | -1.650486 | 1.591642  | 2.936627  |
| C                                     | 0.239869  | 2.404392  | 1.708742  |
| C                                     | -0.629850 | 2.164913  | 3.913558  |
| H                                     | -2.549980 | 2.210355  | 2.877236  |
| H                                     | -1.935125 | 0.561068  | 3.153199  |
| C                                     | 0.152380  | 3.150610  | 3.033975  |
| H                                     | 1.085398  | 1.712197  | 1.687979  |
| H                                     | 0.279911  | 3.054680  | 0.833715  |
| H                                     | 0.027849  | 1.375593  | 4.286269  |
| H                                     | -1.110636 | 2.642221  | 4.767831  |
| H                                     | 1.139282  | 3.387574  | 3.432277  |
| H                                     | -0.404034 | 4.083571  | 2.913252  |
| [(thf) <sub>6</sub> Ca] <sup>2+</sup> |           |           |           |
| Ca                                    | -0.379073 | 0.576811  | 0.006152  |
| O                                     | -0.406586 | -0.016479 | -2.348881 |
| C                                     | -0.260646 | -1.355560 | -2.919797 |

|   |           |           |           |
|---|-----------|-----------|-----------|
| C | -0.590683 | 0.955826  | -3.429037 |
| C | -0.041190 | -1.143059 | -4.413134 |
| H | 0.571234  | -1.852127 | -2.420521 |
| H | -1.180432 | -1.913428 | -2.722639 |
| C | -0.851584 | 0.131315  | -4.684460 |
| H | -1.415977 | 1.613405  | -3.157424 |
| H | 0.326096  | 1.544860  | -3.514331 |
| H | -0.378236 | -1.998667 | -4.999178 |
| H | 1.018009  | -0.976709 | -4.625451 |
| H | -1.915482 | -0.101888 | -4.777392 |
| H | -0.536462 | 0.656024  | -5.586918 |
| O | -0.110541 | -1.742037 | 0.626698  |
| C | -1.176994 | -2.708835 | 0.887359  |
| C | 1.190624  | -2.392923 | 0.800350  |
| C | -0.503272 | -4.073772 | 0.836043  |
| H | -1.592185 | -2.501701 | 1.877516  |
| H | -1.951430 | -2.565858 | 0.135935  |
| C | 0.892893  | -3.766527 | 1.394098  |
| H | 1.662423  | -2.466329 | -0.182856 |
| H | 1.803975  | -1.760439 | 1.443331  |
| H | -0.437364 | -4.429927 | -0.195369 |
| H | -1.044197 | -4.817391 | 1.422237  |
| H | 1.642607  | -4.503778 | 1.105650  |
| H | 0.865059  | -3.715251 | 2.485376  |
| O | -2.753577 | 0.161251  | 0.038827  |
| C | -3.602401 | 0.329188  | 1.222158  |
| C | -3.583430 | -0.207101 | -1.106614 |
| C | -5.040192 | 0.257899  | 0.715942  |
| H | -3.372780 | -0.484356 | 1.914098  |
| H | -3.349620 | 1.281005  | 1.688837  |
| C | -4.916229 | -0.648674 | -0.516533 |
| H | -3.699593 | 0.672761  | -1.745661 |
| H | -3.062487 | -0.985659 | -1.662628 |
| H | -5.395625 | 1.250167  | 0.426623  |
| H | -5.716515 | -0.139019 | 1.473688  |
| H | -5.736050 | -0.522871 | -1.224550 |
| H | -4.876114 | -1.700170 | -0.220423 |
| O | -0.575996 | 2.902134  | -0.576978 |
| C | 0.521437  | 3.814897  | -0.903473 |
| C | -1.852280 | 3.606739  | -0.705461 |
| C | -0.105923 | 5.203514  | -0.965968 |
| H | 1.288877  | 3.711327  | -0.137561 |
| H | 0.934903  | 3.513232  | -1.869286 |
| C | -1.532769 | 4.901436  | -1.443389 |
| H | -2.546441 | 2.954190  | -1.234909 |
| H | -2.237252 | 3.798629  | 0.299737  |
| H | 0.439968  | 5.864988  | -1.639529 |
| H | -0.122449 | 5.663098  | 0.025671  |
| H | -1.551960 | 4.742742  | -2.524773 |
| H | -2.242396 | 5.693006  | -1.200820 |
| O | 2.009555  | 0.954060  | -0.012839 |
| C | 2.832805  | 1.341049  | 1.132800  |
| C | 2.866582  | 0.728761  | -1.178340 |
| C | 4.212833  | 1.643187  | 0.560151  |

|   |           |           |           |
|---|-----------|-----------|-----------|
| H | 2.360305  | 2.195524  | 1.617391  |
| H | 2.858747  | 0.503299  | 1.834887  |
| C | 4.289989  | 0.683342  | −0.635441 |
| H | 2.543746  | −0.194619 | −1.659116 |
| H | 2.722838  | 1.563691  | −1.868881 |
| H | 5.002332  | 1.478569  | 1.294048  |
| H | 4.268918  | 2.681223  | 0.222080  |
| H | 4.543060  | −0.326640 | −0.302408 |
| H | 5.020583  | 0.990034  | −1.384585 |
| O | −0.508625 | 1.178714  | 2.342276  |
| C | −0.606572 | 2.533268  | 2.888652  |
| C | −0.339231 | 0.226530  | 3.435358  |
| C | −0.535971 | 2.381803  | 4.409585  |
| H | 0.228575  | 3.112510  | 2.490347  |
| H | −1.542307 | 2.976495  | 2.546249  |
| C | 0.208987  | 1.051102  | 4.589966  |
| H | −1.315329 | −0.205651 | 3.676450  |
| H | 0.324458  | −0.561759 | 3.085102  |
| H | −1.540574 | 2.314237  | 4.833977  |
| H | −0.025918 | 3.224777  | 4.876494  |
| H | 0.018237  | 0.583105  | 5.556360  |
| H | 1.287499  | 1.191535  | 4.480047  |

[ (PMe<sub>3</sub>) Ca ]<sup>2+</sup>

|    |           |           |           |
|----|-----------|-----------|-----------|
| Ca | 4.048106  | 0.384488  | −0.002224 |
| P  | 1.038630  | 0.236608  | 0.000137  |
| C  | 0.261452  | 1.135074  | −1.412862 |
| H  | −0.827499 | 1.135533  | −1.324515 |
| H  | 0.615472  | 2.167845  | −1.435113 |
| H  | 0.540060  | 0.653925  | −2.352219 |
| C  | 0.253059  | 1.026559  | 1.471439  |
| H  | −0.835997 | 0.986071  | 1.395221  |
| H  | 0.564040  | 0.508441  | 2.380741  |
| H  | 0.564308  | 2.070294  | 1.543281  |
| C  | 0.224291  | −1.416037 | −0.057792 |
| H  | 0.521183  | −1.946433 | −0.964038 |
| H  | 0.527321  | −2.009511 | 0.806634  |
| H  | −0.862908 | −1.307361 | −0.048689 |

[ (PMe<sub>3</sub>)<sub>2</sub>Ca ]<sup>2+</sup>

|    |           |           |           |
|----|-----------|-----------|-----------|
| Ca | 3.185789  | 1.739198  | 1.504760  |
| P  | 0.675589  | 0.546345  | 0.279235  |
| C  | 0.178292  | 1.296909  | −1.332722 |
| H  | −0.741291 | 0.839176  | −1.705074 |
| H  | 0.015210  | 2.369054  | −1.208920 |
| H  | 0.968472  | 1.149370  | −2.070459 |
| C  | −0.872700 | 0.671967  | 1.275085  |
| H  | −1.717023 | 0.237036  | 0.734989  |
| H  | −0.750065 | 0.143386  | 2.222225  |
| H  | −1.091602 | 1.719780  | 1.489558  |
| C  | 0.756413  | −1.253554 | −0.119632 |
| H  | 1.603532  | −1.451173 | −0.779444 |
| H  | 0.890737  | −1.829241 | 0.797987  |
| H  | −0.161448 | −1.583466 | −0.611969 |



|   |          |           |           |
|---|----------|-----------|-----------|
| P | 5.697459 | 0.521294  | 0.301254  |
| C | 6.970632 | 1.730282  | −0.267445 |
| H | 7.824838 | 1.216159  | −0.714433 |
| H | 6.534583 | 2.403613  | −1.007980 |
| H | 7.319166 | 2.325293  | 0.578658  |
| C | 5.433285 | −0.523735 | −1.196039 |
| H | 6.378871 | −0.940055 | −1.550998 |
| H | 4.751688 | −1.343790 | −0.962380 |
| H | 4.991114 | 0.077165  | −1.992671 |
| C | 6.659737 | −0.596620 | 1.411235  |
| H | 6.958232 | −0.057290 | 2.312322  |
| H | 6.041095 | −1.446772 | 1.705612  |
| H | 7.555172 | −0.968296 | 0.907243  |

[ (PMe<sub>3</sub>)<sub>3</sub>Ca]<sup>2+</sup>

|    |           |           |           |
|----|-----------|-----------|-----------|
| Ca | 3.105897  | 0.493844  | 0.249929  |
| P  | 0.575599  | −0.726217 | −0.972598 |
| C  | 0.390564  | −0.516851 | −2.798236 |
| H  | −0.540556 | −0.966119 | −3.151558 |
| H  | 0.388719  | 0.545758  | −3.049800 |
| H  | 1.228593  | −0.990905 | −3.312928 |
| C  | −1.013516 | −0.042177 | −0.325504 |
| H  | −1.870684 | −0.519507 | −0.806775 |
| H  | −1.075733 | −0.207748 | 0.751833  |
| H  | −1.057018 | 1.032614  | −0.512420 |
| C  | 0.350582  | −2.545388 | −0.748641 |
| H  | 1.179084  | −3.082496 | −1.214287 |
| H  | 0.337256  | −2.788236 | 0.315795  |
| H  | −0.586373 | −2.880707 | −1.200006 |
| P  | 5.857809  | −0.342613 | −0.800206 |
| C  | 7.114389  | 0.998448  | −0.978712 |
| H  | 8.044262  | 0.608052  | −1.399385 |
| H  | 6.730019  | 1.782073  | −1.634653 |
| H  | 7.324388  | 1.437732  | −0.001636 |
| C  | 5.819585  | −1.088568 | −2.489359 |
| H  | 6.822253  | −1.381221 | −2.810025 |
| H  | 5.176246  | −1.970758 | −2.488596 |
| H  | 5.415693  | −0.367028 | −3.202470 |
| C  | 6.765644  | −1.613717 | 0.183078  |
| H  | 6.955734  | −1.236322 | 1.189706  |
| H  | 6.163640  | −2.520973 | 0.261764  |
| H  | 7.719799  | −1.861236 | −0.287996 |
| P  | 3.475319  | 2.546714  | 2.505225  |
| C  | 5.229448  | 2.862566  | 2.988134  |
| H  | 5.688518  | 1.938371  | 3.344277  |
| H  | 5.793957  | 3.219300  | 2.124669  |
| H  | 5.285649  | 3.612812  | 3.780716  |
| C  | 2.685582  | 2.141850  | 4.124468  |
| H  | 1.605407  | 2.047190  | 3.998114  |
| H  | 3.074690  | 1.191653  | 4.496293  |
| H  | 2.888428  | 2.920904  | 4.863271  |
| C  | 2.846797  | 4.247996  | 2.159591  |
| H  | 3.331588  | 4.645679  | 1.265591  |
| H  | 1.769906  | 4.216917  | 1.984651  |

|                                                     |           |           |           |
|-----------------------------------------------------|-----------|-----------|-----------|
| H                                                   | 3.048909  | 4.917373  | 2.999184  |
| [(PMe <sub>3</sub> ) <sub>4</sub> Ca] <sup>2+</sup> |           |           |           |
| Ca                                                  | 3.173640  | 0.938509  | −0.525996 |
| P                                                   | 0.639416  | −0.869505 | −0.534070 |
| C                                                   | 0.029599  | −1.332087 | −2.216594 |
| H                                                   | −0.856674 | −1.967803 | −2.149946 |
| H                                                   | −0.224864 | −0.432181 | −2.779573 |
| H                                                   | 0.809811  | −1.869617 | −2.759193 |
| C                                                   | −0.877433 | −0.168115 | 0.253584  |
| H                                                   | −1.713757 | −0.867253 | 0.177787  |
| H                                                   | −0.684172 | 0.038635  | 1.308102  |
| H                                                   | −1.153137 | 0.767336  | −0.236856 |
| C                                                   | 0.783674  | −2.514175 | 0.294080  |
| H                                                   | 1.574266  | −3.099609 | −0.178855 |
| H                                                   | 1.036571  | −2.380483 | 1.347592  |
| H                                                   | −0.155453 | −3.068611 | 0.224881  |
| P                                                   | 5.716718  | −0.853873 | −0.531614 |
| C                                                   | 7.292116  | 0.108943  | −0.616507 |
| H                                                   | 8.159207  | −0.555545 | −0.606673 |
| H                                                   | 7.312438  | 0.701774  | −1.533303 |
| H                                                   | 7.357870  | 0.789221  | 0.234825  |
| C                                                   | 5.901655  | −2.039197 | −1.937169 |
| H                                                   | 6.842174  | −2.590539 | −1.862165 |
| H                                                   | 5.073584  | −2.750739 | −1.933712 |
| H                                                   | 5.885185  | −1.495104 | −2.883650 |
| C                                                   | 5.992990  | −1.936508 | 0.939588  |
| H                                                   | 6.011801  | −1.331288 | 1.847973  |
| H                                                   | 5.180637  | −2.660738 | 1.024975  |
| H                                                   | 6.939456  | −2.475873 | 0.853741  |
| P                                                   | 3.530328  | 2.276472  | 2.242052  |
| C                                                   | 5.178292  | 3.041953  | 2.578042  |
| H                                                   | 5.964722  | 2.290672  | 2.482328  |
| H                                                   | 5.371846  | 3.838704  | 1.857300  |
| H                                                   | 5.212615  | 3.461790  | 3.586361  |
| C                                                   | 3.343570  | 1.106702  | 3.661445  |
| H                                                   | 2.337239  | 0.683518  | 3.663466  |
| H                                                   | 4.061514  | 0.289545  | 3.562918  |
| H                                                   | 3.514751  | 1.614422  | 4.613690  |
| C                                                   | 2.363726  | 3.639023  | 2.683459  |
| H                                                   | 2.465565  | 4.458841  | 1.969715  |
| H                                                   | 1.335773  | 3.274120  | 2.646429  |
| H                                                   | 2.569055  | 4.017708  | 3.687586  |
| C                                                   | 3.183070  | 2.226128  | −4.564643 |
| H                                                   | 3.165207  | 3.017126  | −5.318485 |
| H                                                   | 4.084021  | 1.625701  | −4.705309 |
| H                                                   | 2.312899  | 1.582482  | −4.707908 |
| C                                                   | 1.706069  | 4.074335  | −2.932886 |
| H                                                   | 1.649828  | 4.666514  | −2.017787 |
| H                                                   | 1.779451  | 4.750663  | −3.787908 |
| H                                                   | 0.787593  | 3.491219  | −3.023652 |
| C                                                   | 4.584645  | 4.120802  | −2.920454 |
| H                                                   | 4.620286  | 4.707430  | −2.000808 |
| H                                                   | 5.521079  | 3.567238  | −3.013283 |

|   |          |          |           |
|---|----------|----------|-----------|
| H | 4.491616 | 4.801170 | −3.770335 |
| P | 3.163661 | 2.941708 | −2.862228 |

[(PMe<sub>3</sub>)<sub>5</sub>Ca]<sup>2+</sup>

|    |           |           |           |
|----|-----------|-----------|-----------|
| Ca | −3.062731 | 0.692866  | −0.048306 |
| P  | −5.299685 | −1.408082 | 0.302309  |
| P  | −4.090341 | 3.623276  | −0.791987 |
| P  | −2.725882 | 0.250502  | −3.138322 |
| P  | −0.740576 | −1.342906 | 0.399945  |
| P  | −3.124482 | 1.474086  | 3.051597  |
| C  | −5.720476 | −2.457876 | −1.159449 |
| H  | −6.516162 | −3.166136 | −0.915519 |
| H  | −6.053779 | −1.824963 | −1.984076 |
| H  | −4.840274 | −3.014270 | −1.487148 |
| C  | −6.956931 | −0.744090 | 0.784626  |
| H  | −7.327687 | −0.070256 | 0.010138  |
| H  | −7.676757 | −1.555052 | 0.920447  |
| H  | −6.876351 | −0.185184 | 1.719134  |
| C  | −5.006616 | −2.674322 | 1.617408  |
| H  | −5.854887 | −3.359012 | 1.692781  |
| H  | −4.109080 | −3.251008 | 1.388295  |
| H  | −4.864337 | −2.182956 | 2.581748  |
| C  | −5.060735 | 4.521198  | 0.500485  |
| H  | −4.460141 | 4.630665  | 1.404620  |
| H  | −5.346935 | 5.515502  | 0.148589  |
| H  | −5.964776 | 3.961248  | 0.747715  |
| C  | −5.165194 | 3.856770  | −2.278864 |
| H  | −5.465080 | 4.903020  | −2.377226 |
| H  | −4.624233 | 3.563572  | −3.179254 |
| H  | −6.061831 | 3.239400  | −2.194684 |
| C  | −2.720452 | 4.822792  | −1.123392 |
| H  | −2.126450 | 4.483848  | −1.974138 |
| H  | −3.111365 | 5.819959  | −1.341476 |
| H  | −2.066493 | 4.883879  | −0.251270 |
| C  | −4.270224 | 0.372987  | −4.147855 |
| H  | −4.758247 | 1.333581  | −3.979810 |
| H  | −4.047333 | 0.270310  | −5.212850 |
| H  | −4.961161 | −0.420559 | −3.856350 |
| C  | −1.615630 | 1.478284  | −3.963214 |
| H  | −1.548219 | 1.288185  | −5.037125 |
| H  | −1.995111 | 2.489322  | −3.806077 |
| H  | −0.614940 | 1.413462  | −3.530099 |
| C  | −2.028583 | −1.345671 | −3.760952 |
| H  | −2.012311 | −1.355297 | −4.853701 |
| H  | −1.008675 | −1.479550 | −3.397017 |
| H  | −2.637225 | −2.182103 | −3.412647 |
| C  | 0.811687  | −0.848613 | −0.476993 |
| H  | 1.580218  | −1.620437 | −0.389348 |
| H  | 0.602994  | −0.672380 | −1.533903 |
| H  | 1.193771  | 0.079173  | −0.045083 |
| C  | −1.002672 | −3.068160 | −0.211601 |
| H  | −1.243587 | −3.061205 | −1.275034 |
| H  | −0.105516 | −3.672925 | −0.057676 |
| H  | −1.832742 | −3.528888 | 0.327258  |

|   |           |           |          |
|---|-----------|-----------|----------|
| C | -0.115334 | -1.656559 | 2.110237 |
| H | 0.721996  | -2.358509 | 2.092586 |
| H | 0.218327  | -0.720619 | 2.562095 |
| H | -0.913504 | -2.074925 | 2.725784 |
| C | -1.933490 | 2.824398  | 3.484682 |
| H | -2.131386 | 3.706056  | 2.871292 |
| H | -2.020516 | 3.102060  | 4.538249 |
| H | -0.911067 | 2.493381  | 3.291560 |
| C | -4.716368 | 2.155467  | 3.705151 |
| H | -5.025011 | 3.023500  | 3.121542 |
| H | -5.501436 | 1.399916  | 3.638308 |
| H | -4.606698 | 2.455102  | 4.750410 |
| C | -2.730806 | 0.202068  | 4.334818 |
| H | -3.440999 | -0.624566 | 4.270072 |
| H | -1.727692 | -0.193283 | 4.173253 |
| H | -2.783337 | 0.634119  | 5.337386 |

[ (PMe<sub>3</sub>)<sub>6</sub>Ca]<sup>2+</sup>

|    |           |           |           |
|----|-----------|-----------|-----------|
| Ca | -2.654225 | 0.325257  | 0.057665  |
| P  | -2.396833 | -0.321463 | -3.145430 |
| P  | -3.170727 | 1.225046  | 3.061780  |
| P  | 0.490610  | 0.489938  | 0.501583  |
| C  | -3.583735 | 0.586703  | -4.238965 |
| H  | -3.383287 | 0.374216  | -5.292177 |
| H  | -4.606484 | 0.282968  | -4.011068 |
| H  | -3.500211 | 1.662602  | -4.074049 |
| C  | -0.781287 | 0.046656  | -3.972720 |
| H  | -0.000392 | -0.590324 | -3.554414 |
| H  | -0.845225 | -0.136873 | -5.048269 |
| H  | -0.499786 | 1.087794  | -3.805869 |
| C  | -2.667546 | -2.072212 | -3.683763 |
| H  | -2.607286 | -2.161473 | -4.771351 |
| H  | -1.906336 | -2.715445 | -3.237967 |
| H  | -3.647852 | -2.421376 | -3.354892 |
| C  | 1.564276  | 0.207348  | -0.977263 |
| H  | 1.409688  | -0.802136 | -1.361853 |
| H  | 1.306117  | 0.918192  | -1.764423 |
| H  | 2.619645  | 0.328518  | -0.720506 |
| C  | 1.166778  | 2.096529  | 1.124876  |
| H  | 2.243984  | 2.020184  | 1.292906  |
| H  | 0.984225  | 2.887637  | 0.396233  |
| H  | 0.681998  | 2.369683  | 2.062970  |
| C  | 1.223635  | -0.695661 | 1.718409  |
| H  | 1.054962  | -1.722911 | 1.393102  |
| H  | 2.299689  | -0.532091 | 1.816980  |
| H  | 0.757186  | -0.561866 | 2.695812  |
| C  | -3.865202 | 0.008612  | 4.270600  |
| H  | -4.789514 | -0.423172 | 3.882679  |
| H  | -3.149162 | -0.796871 | 4.438724  |
| H  | -4.074797 | 0.494746  | 5.226686  |
| C  | -4.363224 | 2.629504  | 3.242495  |
| H  | -4.496755 | 2.897162  | 4.293669  |
| H  | -3.993851 | 3.501516  | 2.701868  |
| H  | -5.333004 | 2.354665  | 2.824611  |

|   |           |           |           |
|---|-----------|-----------|-----------|
| C | -1.708634 | 1.866767  | 3.995924  |
| H | -0.940134 | 1.093987  | 4.061528  |
| H | -1.288375 | 2.729026  | 3.475897  |
| H | -1.992482 | 2.170323  | 5.006639  |
| P | -5.813880 | 0.049682  | -0.419266 |
| C | -6.654060 | 1.446149  | -1.296633 |
| H | -7.723884 | 1.248299  | -1.401494 |
| H | -6.520629 | 2.372465  | -0.735983 |
| H | -6.221508 | 1.579124  | -2.289904 |
| C | -6.431376 | -1.400028 | -1.390829 |
| H | -6.001515 | -1.393790 | -2.393557 |
| H | -6.144090 | -2.329363 | -0.897939 |
| H | -7.520490 | -1.368182 | -1.475496 |
| C | -6.855377 | -0.083560 | 1.105899  |
| H | -6.714510 | 0.797725  | 1.733713  |
| H | -7.914118 | -0.165523 | 0.847279  |
| H | -6.565301 | -0.963488 | 1.682639  |
| P | -2.557859 | -2.791309 | 0.799523  |
| C | -1.345417 | -3.809091 | -0.160463 |
| H | -1.319221 | -4.836562 | 0.211106  |
| H | -1.627988 | -3.824048 | -1.214472 |
| H | -0.344678 | -3.380724 | -0.078748 |
| C | -4.078083 | -3.836339 | 0.671411  |
| H | -4.412397 | -3.878411 | -0.366172 |
| H | -3.876972 | -4.853437 | 1.017361  |
| H | -4.878970 | -3.409056 | 1.277553  |
| C | -2.033823 | -3.144188 | 2.539752  |
| H | -2.792138 | -2.775386 | 3.232295  |
| H | -1.909712 | -4.218297 | 2.698256  |
| H | -1.090309 | -2.641975 | 2.760680  |
| P | -2.588156 | 3.443293  | -0.740046 |
| C | -4.100341 | 4.320810  | -1.344817 |
| H | -3.859873 | 5.346474  | -1.636177 |
| H | -4.518948 | 3.798706  | -2.205820 |
| H | -4.855287 | 4.348351  | -0.556981 |
| C | -1.406942 | 3.761861  | -2.131358 |
| H | -1.750385 | 3.256253  | -3.035348 |
| H | -1.325677 | 4.831501  | -2.339703 |
| H | -0.417236 | 3.375223  | -1.879211 |
| C | -1.974810 | 4.647947  | 0.525077  |
| H | -2.677370 | 4.703956  | 1.357596  |
| H | -1.006320 | 4.331577  | 0.914360  |
| H | -1.871614 | 5.644099  | 0.087261  |
